# Supplementary material for: NaCo7.38(PO4)4Cl4 in a series of homeotype compounds with stable cationic substructures derived from the sulphohalite archetype
Source: Royal Society of Chemistry journal article supplement (doi:10.1039/d3ce00819c), 2023-01-01
Supplement: d3ce00819c1.pdf [file d3ce00819c1.pdf]

Table S1. Atomic coordinates and equivalent isotropic displacement parameters (Å<sup>2</sup>)

| Atom  | x         | y         | z         | U(eq)    |
|-------|-----------|-----------|-----------|----------|
| Co(1) | 0.7458(1) | 0.7458(1) | 0.3115(1) | 0.005(1) |
| Co(2) | 0.0       | 0.7310(1) | 0.5       | 0.006(1) |
| P(1)  | 0.0       | 0.5       | 0.25      | 0.007(1) |
| P(2)  | 0.5       | 0.5       | 0.2119(1) | 0.004(1) |
| Na(1) | 0.5       | 0.5       | 0.5       | 0.013(1) |
| Cl(1) | 0.7685(1) | 0.7685(1) | 0.0727(1) | 0.011(1) |
| O(1)  | 0.5963(2) | 0.4037(2) | 0.1196(3) | 0.007(1) |
| O(2)  | 0.9227(2) | 0.6110(2) | 0.3396(2) | 0.011(1) |
| O(3)  | 0.5949(2) | 0.5949(2) | 0.2994(3) | 0.008(1) |
